# Supplementary material for: Extensive purifying selection acting on synonymous sites in HIV-1 Group M sequences
Source: PubMed Central journal article supplement (PMC2666660; doi:10.1186/1743-422x-5-160), 2008-12-23

### Additional file 3

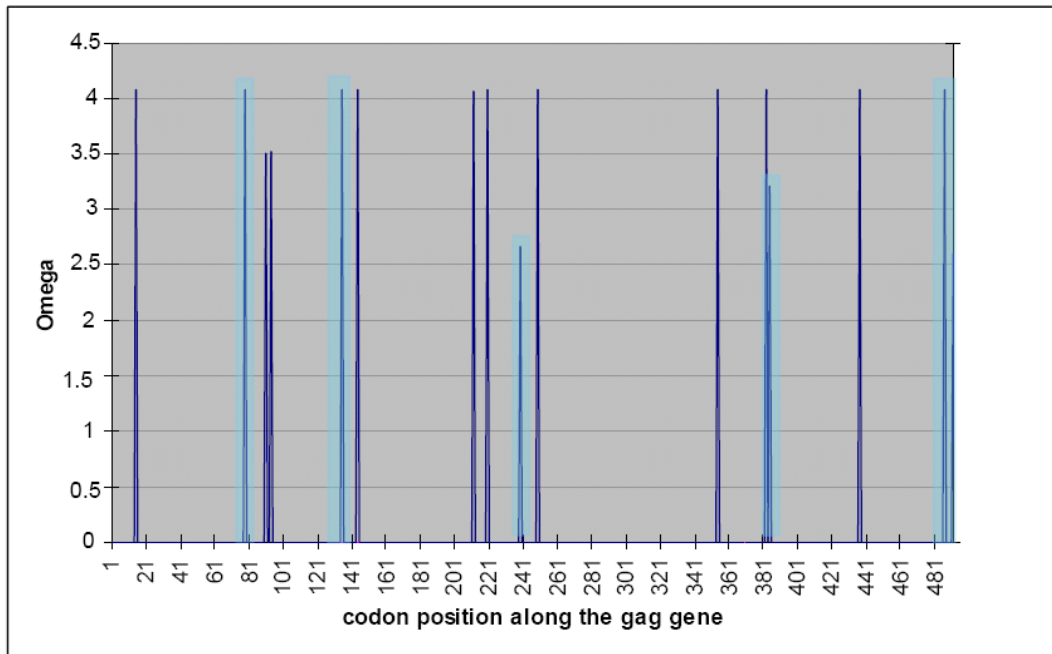

Supplement: 1743-422X-5-160-S3.pdf [file 1743-422X-5-160-S3.pdf]
